# Supplementary material
Source: HighWire-hosted journal article supplement (https://www.annfammed.org/highwire/filestream/8920/field_highwire_adjunct_files/0/HudonAFM-418-17_Supp_App_Tables.pdf)
Supplement: HudonAFM-418-17_Supp_App_Tables.pdf [file HudonAFM-418-17_Supp_App_Tables.pdf]

## **Supplemental materials for:**

Hudon C, Chouinard M, Dubois M, et al. Case management in primary care for frequent users of health care services: a mixed methods study. *Ann Fam Med*. 2018;16(3):232-239.

**Appendix 1. Characteristics of interview participants: patients and spouses.**

| <b>Characteristic</b>                    | <b>Patient<br/>(n=25)</b> | <b>Spouse<br/>(n=8)</b> |
|------------------------------------------|---------------------------|-------------------------|
| <b>Sex</b>                               |                           |                         |
| Male                                     | 11                        | 1                       |
| Female                                   | 14                        | 7                       |
| <b>Age group</b>                         |                           |                         |
| 35-44 years old                          | 5                         | 0                       |
| 45-54 years old                          | 5                         | 2                       |
| 55-64 years old                          | 3                         | 3                       |
| 65-74 years old                          | 7                         | 3                       |
| 75-84 years old                          | 5                         | 0                       |
| <b>Mean age (SD)</b>                     | 60.1 (15.3)               | -                       |
| <b>Married / living with a partner</b>   | 19                        | 8                       |
| <b>Annual household income (CAN\$)**</b> |                           |                         |
| Less than \$ 20 000                      | 5                         | -                       |
| \$ 20 000 to \$ 49 999                   | 13                        | -                       |
| \$ 50,000 or more                        | 6                         | -                       |

\* Age and family income were not collected for family member.

\*\* Data missing for a patient.

CAN\$: Canadian dollars; SD: Standard deviation.

**Appendix 2. Characteristics of interview and focus group participants: family physicians, nurse case managers, and health managers.**

| <b>Characteristic</b>         | <b>Family physician<br/>(n=21)</b> | <b>Nurse case manager<br/>(n=6)</b> | <b>Health manager<br/>(n=9)</b> |
|-------------------------------|------------------------------------|-------------------------------------|---------------------------------|
| <b>Sex</b>                    |                                    |                                     |                                 |
| Male                          | 9                                  | 1                                   | 2                               |
| Female                        | 12                                 | 5                                   | 7                               |
| <b>Age group (years old)*</b> |                                    |                                     |                                 |
| 25-34                         | 1                                  | 2                                   | 0                               |
| 35-44                         | 1                                  | 3                                   | 5                               |
| 45-54                         | 14                                 | 0                                   | 2                               |
| 55-64                         | 4                                  | 0                                   | 2                               |
| <b>Years of practice**</b>    |                                    |                                     |                                 |
| 0-9                           | 1                                  | 0                                   | 0                               |
| 10-19                         | 1                                  | 5                                   | 4                               |
| 20-29                         | 15                                 | 0                                   | 2                               |
| 30-39                         | 3                                  | 0                                   | 1                               |

\* Missing data for a family physician and nurse case manager; \*\* Missing data for a family physician, a nurse case manager and two health managers.
